# Supplementary material
Source: publisher figshare collection journal article supplement (https://aacr.figshare.com/articles/dataset/_/22450185)
Supplement: Supplementary file 1 [file 39901251]

**Supplemental table 1:** Mean (CV%) PK parameters of SAR3419 at 55 mg/m<sup>2</sup> obtained after first and last administration.

| Study schedule                                                                        | N  | C <sub>max</sub><br>(µg/mL) | AUC <sub>0-τ</sub> <sup>a</sup><br>(µg.day/mL) | t <sub>1/2Z</sub><br>(day) | CL <sub>ss</sub><br>(L/day) | V <sub>ss</sub><br>(L) | C <sub>avg</sub><br>(µg/mL) |
|---------------------------------------------------------------------------------------|----|-----------------------------|------------------------------------------------|----------------------------|-----------------------------|------------------------|-----------------------------|
| <b>1<sup>st</sup> SAR3419 administration (Week 1)</b>                                 |    |                             |                                                |                            |                             |                        |                             |
| Weekly optimized                                                                      | 40 | 28.4<br>(27)                | 103<br>(30)                                    | -                          | -                           | -                      | 14.7<br>(30)                |
| <b>Last SAR3419 administration (5<sup>th</sup> to 12<sup>th</sup> administration)</b> |    |                             |                                                |                            |                             |                        |                             |
| Weekly                                                                                | 14 | 50.5<br>(31)                | 227<br>(37)                                    | 8.96<br>(41)               | 0.514<br>(44)               | 6.39<br>(52)           | 32.4<br>(37)                |
| Optimized                                                                             | 9  | 41.6<br>(26)                | 260<br>(31)                                    | 7.99<br>(27)               | 0.438<br>(56)               | 4.34<br>(28)           | 18.6<br>(31)                |

<sup>a</sup> : τ corresponds to the dosing interval: 7 days after the first administration whatever the study schedule and the last weekly administration and 14 days after the last administration in the optimized schedule.

**Supplemental figure 1:** SAR3419  $C_{trough}$  observed during repeated intravenous infusion of SAR3419 using weekly or optimized schedules

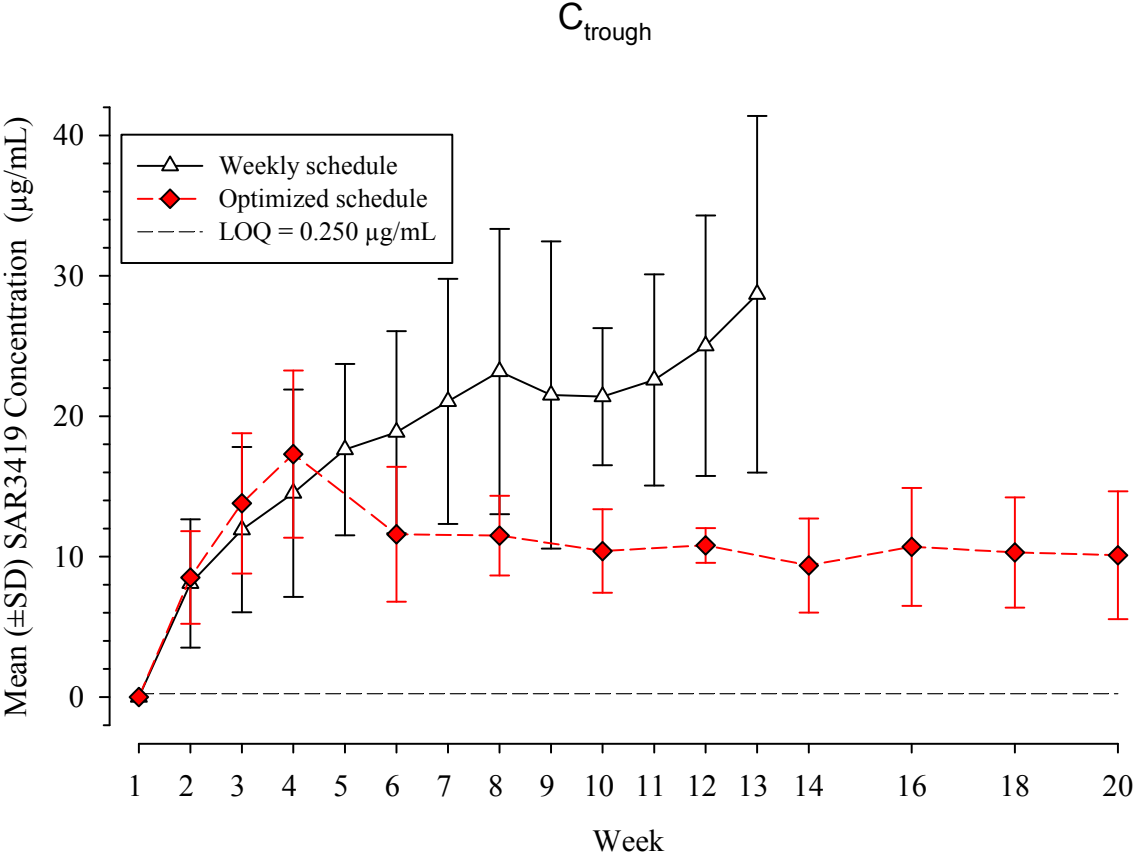

**Supplemental table 2:** relationship between CD19 expression, proliferation (KI67), mitosis (pHH3) and p53 status with observed observed responses at the MTD during the optimized schedule

|     |             | CD19 - DAKO |                     | KI67                | p53                 | pHistone H3         | Lymphoma subtype                       |
|-----|-------------|-------------|---------------------|---------------------|---------------------|---------------------|----------------------------------------|
|     |             | intensity   | % of positive cells |                                        |
| CR  | 250-003-110 | 3           | 90                  | 50                  | < 10 %              | 5%                  | Follicular GII                         |
| Cru | 250-004-105 | 1           | 30                  | 5                   | < 10 %              | < 1 %               | Follicular grade unknown               |
|     | 250-006-112 | 3           | 90                  | 40                  | < 10 %              | < 1 %               | DLBC                                   |
| PR  | 250-005-103 | 3           | 90                  | 60                  | < 10 %              | 1%                  | DLBC                                   |
|     | 250-005-211 | 2           | 90                  | NI                  | NI                  | NI                  | MALT                                   |
| SD  | 250-004-106 | 1           | 70                  | 50                  | < 10 %              | NI                  | Follicular G IIIB transforming in DLBC |
|     | 250-004-111 |             |                     | 10                  | No slide            | No slide            | follicular G II                        |
|     | 250-006-113 | 1           | 50                  | 70                  | < 10 %              | 1%                  | DLBC                                   |
|     | 250-004-204 | NI          |                     | NI                  | NI                  | NI                  | Follicular grade unknown               |
|     | 250-006-208 | 2           | 80                  | 1                   | < 10 %              | 0                   | MALT                                   |
| PD  | 250-006-108 | 2           | 50                  | 80                  | > 10 %              | 1%                  | DLBC                                   |
|     | 250-006-109 | 1           | 10                  | 0                   | < 10 %              | 0                   | DLBC                                   |
|     | 250-004-205 | 3           | 90                  | 40                  | < 10 %              | 1%                  | follicular G II                        |
